# Supplementary material
Source: PubMed Central journal article supplement (PMC4191762)
Supplement: pnas.201324002SI.pdf [file pnas.201324002SI.pdf]

# Supporting Information

Chaboureau et al. 10.1073/pnas.1324002111

## Validation of Paleoclimate and Paleobiome Simulations

**Mesozoic Biomes Derived from LPJ.** LPJ is a dynamic global vegetation model that computes photosynthesis, evapotranspiration, and ultimately net primary production and surface cover of vegetation through 10 plant functional types (PFTs). These PFTs are differentiated by physiological, morphological, phenological, bioclimatic, and fire response attributes (1). The phenology differentiation is constructed referring to phenology of present-day groups of plants: evergreen, raingreen, and summergreen. Such a distinction is neither relevant nor very well constrained for Mesozoic vegetation, so here the woody PFTs have been gathered according to their bioclimatic characteristics (tables 1 and 2 in ref. 1), ultimately giving tropical, temperate, and boreal biomes. Temperate and tropical herbaceous PFTs were kept in the analysis (Table S2).

**Testing the Impact of pCO<sub>2</sub>: A Model–Data Comparison.** The aim of this part is to test the 15 simulations performed with FOAM-LPJ for the five continental configurations and for the three atmospheric CO<sub>2</sub> concentrations used here (560, 1,120, and 2,240 ppm). The five continental configurations stand for the Late Triassic, the Early Jurassic, the Early Cretaceous, the mid-Cretaceous, and the Late Cretaceous. We first compare our model outputs, e.g., biomes, to the geographical distribution of climate-sensitive sediments. Based on the works of Warren, Scotese, Parrish et al., and Chumakov et al. (2–5), we have plotted the location of evaporites and coals on our five paleogeographic maps (Fig. S1).

Coals are indicators of a humid climate and are found at low and high latitudes. They are not discriminating for the temperature and can be found under cool or warm climatic conditions (3). For the Late Triassic, very few sites characterized by the presence of coal deposits exist. When computing the spatial fit between coals and simulated biomes (i.e., the percentage of coal sites that are not found in an arid biome), it appears that atmospheric CO<sub>2</sub> concentrations of 1,120 and 2,240 ppm are better to fit the data (Table S1). Indeed, some desert regions appear at 560 ppm over the high latitudes where coal deposits are found. For the Early Jurassic (180 Ma), many more sites with coal deposits have been listed. Here again, except for one site located at 35°S to 75°E, the agreement between model and data is perfect for the high CO<sub>2</sub> levels (1,120 and 2,240 ppm). An atmospheric CO<sub>2</sub> level of 560 ppm induces the extension of desert regions over the northern high latitudes where coal deposits are found. For the Cretaceous geographies, the same conclusions can be drawn. First, most of the coal deposits are located outside the desert areas, and second, a CO<sub>2</sub> concentration of 560 ppm does a less good job in simulating humid areas fitting the coal's distribution.

Evaporites are generally used in the literature to constrain the areal extent of arid zones. However, based on the study of the South Atlantic evaporitic basin (visible on the Early Cretaceous map), Chaboureau et al. (6) have demonstrated that the evaporites deposited in the southern part of the Central segment (20°S–10°S) may have been controlled by the climate favoring aridity and high saline waters. In contrast, the evaporites of the northern part (10°S to 5°N) can hardly be reconciled with the climatic conditions occurring there and may be due to hydrothermal sources. This hypothesis is supported by the gradient found in the mineralogical composition from the north to the south. From this study, we also note that seasonally arid climate is enough to simulate environmental conditions in agreement

with the formation of evaporites. If now we look at the geographical distribution of the evaporites on our maps, one can first conclude that they are less abundant than the coal deposits. Second, evaporitic basins are mainly localized over the desert area, although some are found over the tropical biome. A closer inspection shows that most of the evaporites found over the tropical biome are close to the tropical–desert transition area. In detail, this transition is marked by savannah, which corresponds to a highly seasonal climate (one rainy season and one arid season).

As an intermediate conclusion, for each time interval, no big mismatch appears between our bioclimatic maps and the data record. This shows that (i) our numerical simulations can be trusted for use as a basis to interpret the way the angiosperms have colonized the temperate areas and (ii) 1,120 and 2,240 ppm scenarios produce better fit with continental data than 560 ppm.

To go a step further in our model–data comparison and find out the best fit between 1,120 and 2,240 ppm for each time interval, we need to compare our climatic simulations with other proxies, namely, reconstructed sea surface temperatures. Unfortunately, such datasets are not available for the Late Triassic and the Early Jurassic. Thus, for these periods we relied on pCO<sub>2</sub> estimates from the literature to choose our scenarios. These estimates have high uncertainties, and most rely on stomatal analyses of different tree species. The latest studies suggest values of *ca.* 900 ppmv (7), whereas most studies agree on a background atmospheric pCO<sub>2</sub> of *ca.* 1,000 ppm for the late Triassic and the early Jurassic [whereas a doubling of this value likely occurred at the Triassic–Jurassic boundary event (8–11)]. Given this information and the good fit of coals with our simulation (Table S1), we chose 1,120 ppm as the best-fit scenario for the late Triassic and the early Jurassic.

Tentative reconstructions of sea surface temperature (SST) gradients are available for Cretaceous times, for which foraminifera and fish tooth  $\delta^{18}\text{O}_p$ , TEX<sub>86</sub>, and D47 are used (12–20). Because of uncertainties concerning our understanding of the way marine organisms record temperature, an envelope delimited by simulated winter and summer SSTs in the northern hemisphere is plotted for each simulation in Fig. S2. Temperatures have been averaged between 60°W and 140°E because most SSTs estimates are coming from Tethysian locations. Because they are driving evaporation budget and related moisture advection toward the continent, we pay particular attention to midlatitude to high-latitude SSTs.

For the Aptian, high-latitude SSTs have been derived from the clumped isotope thermometry D47 measured on Berrasian–late Valanginian belemnites (12), which allows us to estimate temperature during shell biomineralization and to assess  $\delta^{18}\text{O}$  shells independent of seawater  $\delta^{18}\text{O}$ . Accounting for error bars, the authors suggest temperatures ranging from 10 to 20 °C at that time. At 1,120 ppm (Fig. S2A), simulated SSTs at the same latitude are clearly out of this range (0–7 °C), whereas the fit is better at 2,240 ppmv, temperatures ranging from 4 °C to 17 °C (Fig. S2B). At low latitude, the congruence with the TEX<sub>86</sub> data is also better with 2,240-ppm simulation, whereas temperatures are underestimated at 1,120 ppm.

For 90 Ma, the temperatures have been reconstructed from rudists (18), TEX<sub>86</sub> measurements (14), and planktonic foraminifera  $\delta^{18}\text{O}$  (19) and show strong variations. For instance, temperature at 30°N range from 16 °C to 32 °C depending on the proxy used. The main uncertainties in the reconstruction of paleotemperatures from biogenic carbonate include assumptions

about the equilibrium fractionation in extinct species, about the true  $\delta$  water value, and about the possible diagenesis. Here the selected planktonic foraminifera data in the study of (19) exclude altered carbon material, but the nonequilibrium calcification could cause underestimated actual upper ocean water temperatures by the isotopic measurements. In contrast to the foraminifera, the outer layer of certain groups of rudist is compact and has a good potential to preserve the original chemical and isotopic composition (18). For both 1,120 and 2,240 ppm scenarios, our simulations fail to capture the lower range of low-latitude reconstructions (by the planktonic foraminifera). At 2,240 ppm, simulated temperatures are high enough at 60°N to encompass reconstructed temperatures from foraminifera, which range between 17 °C and 20 °C at this latitude (Fig. S2D) and are consistent with the high values at the low latitudes. The 1,120-ppm experiment depicts temperatures that are too cool to match the data (Fig. S2C).

For 70 Ma, the robustness of the reconstructed temperatures from fish tooth  $\delta^{18}\text{O}_p$  (16) is more important because the oxygen isotopes of biogenic phosphate are less prone to postmortem alteration (in comparison with biogenic carbonate) and no nonequilibrium oxygen isotope fractionation has been observed during precipitation of biogenic apatite. For 1,120 ppm the envelope fit with 70% of reconstructed temperatures from fish tooth  $\delta^{18}\text{O}_p$  (Fig. S2E) versus only 51% with 2,240 ppm (Fig. S2F). In particular, the midlatitude to high-latitude reconstructions (11–12 °C at 50°) fit better with simulated SSTs from the 1,120-ppm scenario (10 °C in winter, 26 °C in summer), whereas the sensitivity of the simulated low-latitude summer and winter SSTs is low and less discriminating (between 25 °C and 35 °C at 20° of latitudes).

To summarize, although model–data discrepancies still exist, as the reader can easily see in Fig. S2, their comparison shows the best correspondence for atmospheric  $\text{CO}_2$  at 2,240 ppm for the Early and mid-Cretaceous and 1,120 ppm for the Late

Cretaceous (Fig. S2). Therefore, we have integrated and discussed the results of these best-fit model–data simulations in our manuscript.

### Assessment of Model Limitations

For consistency purposes, we used identical atmospheric  $\text{CO}_2$  concentration ( $p\text{CO}_2$ ) for FOAM and LPJ in our analysis. However, despite the common use of LPJ-like models (e.g., Biome4) to assess global vegetation changes under past and future climate conditions, the behavior of such algorithms under  $p\text{CO}_2$  far higher than present, such as those of the Mesozoic, has not been studied to our knowledge. For example, the  $\text{CO}_2$  fertilization effect ( $\text{CO}_2$  rise that leads to an increase in photosynthesis activity that ultimately drives a strong enhancement of net primary productivity) has been shown to be correctly simulated in temperate areas and overestimated in tropical forests for present day (21), but to what extent this effect and limitations are valid for Mesozoic vegetation and  $p\text{CO}_2$  remains unknown. To test this potential limitation and make sure that the vegetation changes discussed in the paper are linked to climate and not to an artificial fertilization effect, the climatic outputs from the FOAM experiments were used to force LPJ offline with varying prescribed  $p\text{CO}_2$ , from 280 ppm to 2,240 ppm.

Fig. S3 shows the impact of  $\text{CO}_2$  fertilization: increasing prescribed  $p\text{CO}_2$  from 280 ppm to 1,120 or 2,240 ppm in LPJ drives a rise in temperate PFTs at the global scale, at the expense of desert areas. This phenomenon is independent from the chosen climatic scenario (here 1,120 ppm or 2,240 ppm) from FOAM. Most importantly, Fig. S3 shows that the LPJ  $\text{CO}_2$  effect does not affect the trend of temperate biome evolution through time: the picture of increasing temperate biome fractions throughout the Mesozoic is still valid when LPJ is forced with  $p\text{CO}_2$  as low as 280 ppm, confirming that climate is playing the most important role in this trend.

- Sitch S, et al. (2003) Evaluation of ecosystem dynamics, plant geography and terrestrial carbon cycling in the LPJ dynamic global vegetation model. *Global Change Biol* 9(2):161–185.
- Warren JK (2006) *Evaporites: Sediments, Resources, and Hydrocarbons* (Springer, Berlin).
- Scotese C (2000) The Palaeomap Project. Available at [www.scotese.com](http://www.scotese.com).
- Parrish JT, Ziegler AM, Scotese CR (1982) Rainfall patterns and the distribution of coals and evaporites in the Mesozoic and Cenozoic. *Palaeogeogr Palaeoclimatol Palaeoecol* 40(1-3):67–101.
- Chumakov NM, et al. (1995) Climatic belts of the mid-Cretaceous time. *Stratigr Geol Correl* 3(3):241–260.
- Chaboureaud A-C, et al. (2012) The Aptian evaporites of the South Atlantic: A climatic paradox? *Clim Past* 8(3):1047–1058.
- Steinthorsdottir M, Wohlfarth B, Kylander ME, Blaauw M, Reimer PJ (2013) Stomatal proxy record of  $\text{CO}_2$  concentrations from the last termination suggests an important role for  $\text{CO}_2$  at climate change transitions. *Quat Sci Rev* 68:43–58.
- Beerling DJ, Royer DL (2002) Reading a  $\text{CO}_2$  signal fossil stomata. *New Phytol* 153(3):387–397.
- McElwain JC, Beerling DJ, Woodward FI (1999) Fossil plants and global warming at the Triassic–Jurassic boundary. *Science* 285(5432):1386–1390.
- Bonis NR, van Konijngburg-van Cittert JHA, Kürschner WM (2010) Changing  $\text{CO}_2$  conditions during the end-Triassic inferred from stomatal frequency analysis on *Lepidopteris ottonis* (Goeppert) Schimper and *Ginkgoites taeniatus* (Braun) Harris. *Palaeogeogr Palaeoclimatol Palaeoecol* 29(1-2):146–161.
- Retallack GJ (2009) Greenhouse crises of the past 300 million years. *Geol Soc Am Bull* 121(9-10):1441–1454.
- Price GD, Passey BH (2013) Dynamic polar climates in a greenhouse world: Evidence from clumped isotope thermometry of early Cretaceous belemnites. *Geology* 41(8):923–926.
- Little K, Robinson SA, Bown PR, Nederbragt AJ, Pancost RD (2011) High sea-surface temperatures during the Early Cretaceous Epoch. *Nat Geosci* 4(3):169–172.
- Sinninghe Damsté JS, van Bentum ZC, Reichert G-J, Pross J, Schouten S (2010) A  $\text{CO}_2$  decrease-driven cooling and increased latitudinal temperature gradient during the mid-Cretaceous Oceanic Anoxic Event 2. *Earth Planet Sci Lett* 248(1-2):426–437.
- Mutterlose J, Malkoc M, Schouten S, Sinninghe Damsté JS, Forste A (2010)  $\text{TEX}_{86}$  and stable  $\delta^{18}\text{O}$  paleothermometry of early Cretaceous sediments: Implications for belemnite ecology and paleotemperature proxy application. *Earth Planet Sci Lett* 298(3-4):286–298.
- Pucéat E, et al. (2010) Revised phosphate-water fractionation equation reassessing paleotemperatures derived from biogenic apatite. *Earth Planet Sci Lett* 298(1-2):135–142.
- Pucéat E, et al. (2007) Fish tooth  $\delta^{18}\text{O}$  revising Late Cretaceous meridional upper ocean water temperature gradients. *Geology* 35(2):107–110.
- Steuber T, Rauch M, Masse J-P, Graaf J, Malkoc M (2005) Low-latitude seasonality of Cretaceous temperatures in warm and cold episodes. *Nature* 437(7063):1341–1344.
- Bice KL, Norris RD (2002) Possible atmospheric  $\text{CO}_2$  extremes of the Middle Cretaceous (late Albian–Turonian). *Paleoceanography* 17(4):1070.
- Pearson PN, et al. (2001) Warm tropical sea surface temperatures in the Late Cretaceous and Eocene epochs. *Nature* 413(6855):481–487.
- Hickler T, et al. (2008)  $\text{CO}_2$  fertilization in temperate FACE experiments not representative of boreal and tropical forests. *Global Change Biol* 14(7):1531–1542.



C1. Aptian - 120 Ma - 560 ppm

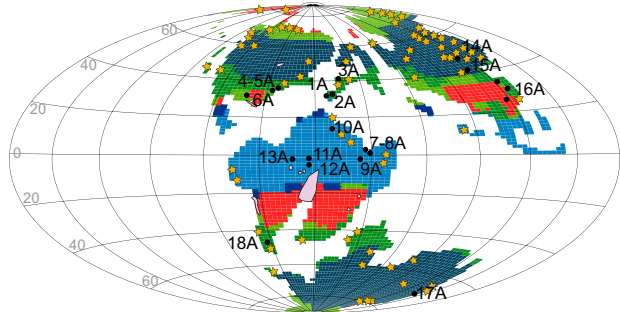

D1. Cenomanian - 95 Ma - 560 ppm

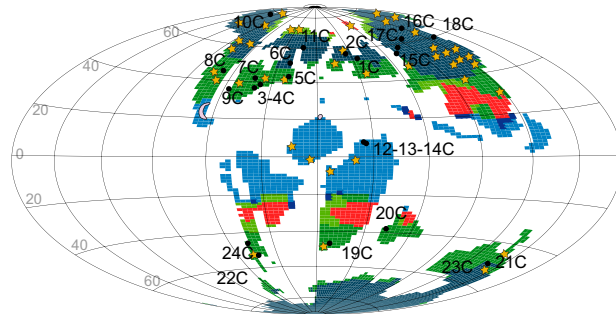

C2. Aptian - 120 Ma - 1120 ppm

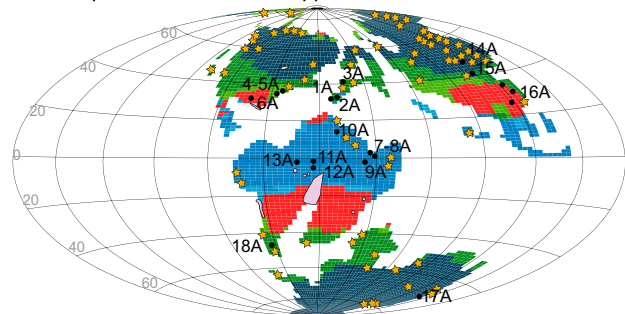

D2. Cenomanian - 95 Ma - 1120 ppm

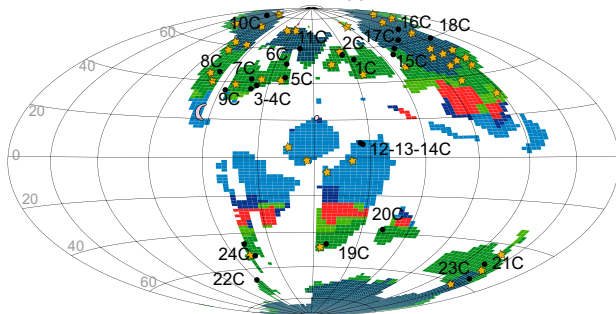

C3. Aptian - 120 Ma - 2240 ppm (best fit model-data)

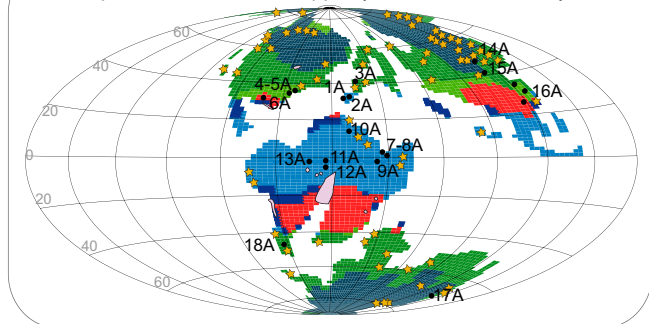

D3. Cenomanian - 95 Ma - 2240 ppm (best fit model-data)

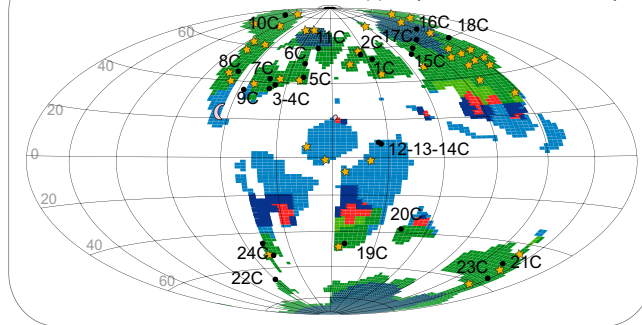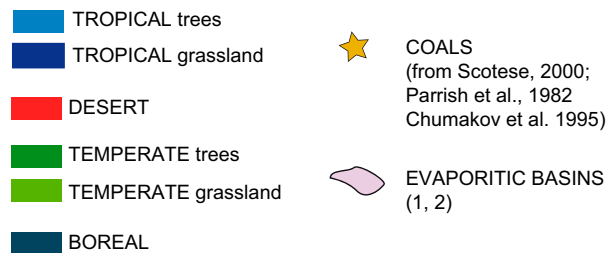

Fig. S1. (Continued)







### A. FOAM (1120 ppmv)

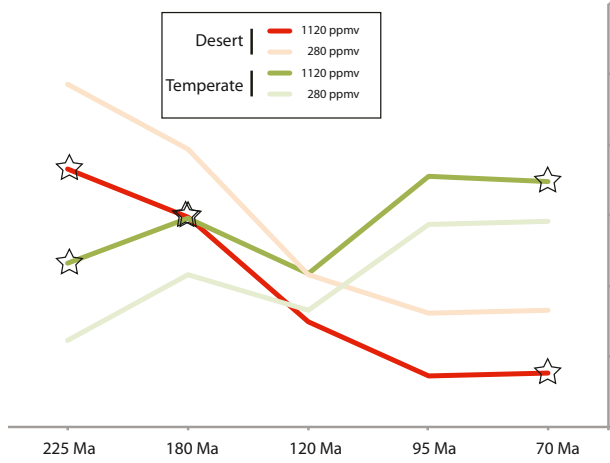

### B. FOAM (2240 ppmv)

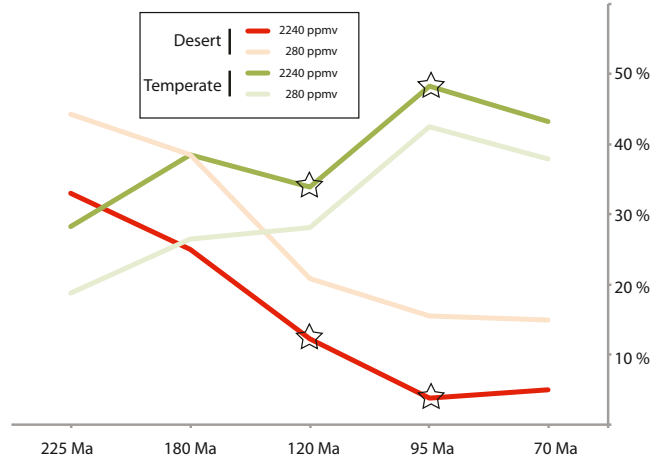

**Fig. S3.** Evolution of temperate (woody and herbaceous) and desert fractions simulated in LPJ. LPJ is either launched using the same CO<sub>2</sub> as the one used in FOAM (runs shown in the main text) or performed using the preindustrial CO<sub>2</sub> concentration. (A) Climate runs at 1,120 ppm and (B) climate runs at 2,240 ppm. Stars indicate the best-fit simulations retained in the manuscript.

**Table S1. Percentage of coals located under nondesertic biome**

| Timeslices                | % of coals under nondesertic biomes at 560 ppm | % of coals under nondesertic biomes at 1120 ppm | % of coals under nondesertic biomes at 2240 ppm |
|---------------------------|------------------------------------------------|-------------------------------------------------|-------------------------------------------------|
| Late Triassic (225 Ma)    | 87.8%                                          | <b>89.9%</b>                                    | 89.9%                                           |
| Early Jurassic (180 Ma)   | 95.9%                                          | <b>98.6%</b>                                    | 98.6%                                           |
| Early Cretaceous (120 Ma) | 95.9%                                          | 98.6%                                           | <b>100%</b>                                     |
| Mid-Cretaceous (90 Ma)    | 97.5%                                          | 100%                                            | <b>100%</b>                                     |
| Late Cretaceous (70 Ma)   | 98.2%                                          | <b>100%</b>                                     | 100%                                            |

The best-fit scenarios are in bold.

**Table S2. Correspondence between LPJ plant functional types and biomes used in this study**

| LPJ original PFTs                  | Corresponding biomes in this study |
|------------------------------------|------------------------------------|
| Tropical broad-leaved evergreen    | Tropical                           |
| Tropical broad-leaved raingreen    | Tropical                           |
| Temperate needle-leaved evergreen  | Temperate                          |
| Temperate broad-leaved evergreen   | Temperate                          |
| Temperate broad-leaved summergreen | Temperate                          |
| Boreal needle-leaved summergreen   | Boreal                             |
| Boreal needle-leaved evergreen     | Boreal                             |
| Boreal broad-leaved summergreen    | Boreal                             |
| Temperate herbaceous               | Temperate herbaceous               |
| Tropical herbaceous                | Tropical herbaceous                |
| Desert                             | Desert                             |



**Table S3. Details of the main fossil sites (numbered in Fig. 2) according to the review by Friis et al. (1) and their climate correspondence in this study**

| No. | Country                     | Locality                       | Type of fossils                                                      | Dating                       | Ref(s).                | LPJ biome (this study) |
|-----|-----------------------------|--------------------------------|----------------------------------------------------------------------|------------------------------|------------------------|------------------------|
| 1A  | Portugal                    | Torres Vedras                  | Mesofossils                                                          | Late Barremian–Early Aptian  | 2–4                    | Tropical               |
| 1A  | Portugal                    | Cos-Juncal–Nazaré–Leiria       | Mesofossils                                                          | Late Aptian                  | 2–4                    | Tropical               |
| 1A  | Portugal                    | Figueira da Foz                | Mesofossils                                                          | Late Aptian                  | 4, 5                   | Tropical               |
| 1A  | Portugal                    | Torres Vedras                  | Fragmentary angiosperm remains of leaf floras                        | Late Barremian–Early Aptian  | 6–8                    | Tropical               |
| 1A  | Portugal                    | Catefica                       | Diverse well-preserved flowers, fruits, seeds                        | Late Barremian–Aptian        | 9, 10                  | Tropical               |
| 1A  | Portugal                    | Cercal                         | Leaf floras                                                          | Aptian–Albian                | 2, 6, 7, 11            | Tropical               |
| 1A  | Portugal                    | Nazare                         | Angiosperm leaves                                                    | Late Albian                  | 6, 7, 9, 12            | Tropical               |
| 1A  | Portugal                    | Famalicao                      | Mesofossil flora (diverse)                                           | Late Aptian                  | 9, 12–15               | Tropical               |
| 1A  | Portugal                    | Vale de Agua                   | Angiosperm flowers, fruits, seeds and dispersed stamens              | Late Aptian–Early Albian     | 9, 10, 12, 13, 16–21   | Tropical               |
| 1A  | Portugal                    | Juncal                         | Macrofossil and mesofossil flora                                     | Late Aptian–Early Albian     | 9                      | Tropical               |
| 1A  | Portugal                    | Figueira da Foz                | Leaves of angiosperms                                                | Late Aptian–Early Albian     | 6, 7                   | Tropical               |
| 1A  | Portugal                    | Buarcos                        | Angiosperm flowers, fruits, seeds (diverse mesofossils)              | Late Aptian–Early Albian     | 10, 12, 13, 17, 22, 23 | Tropical               |
| 1A  | Portugal                    | Villa Verde                    | Mesofossil floras                                                    | Late Aptian–Early Albian     | 24, 25                 | Tropical               |
| 2A  | Spain                       | Cuenca                         | Mesofossil floras, tricolpate pollen                                 | Late Barremian               | 26                     | Tropical               |
| 3A  | Great Britain               | Isle of White                  | Pollen                                                               | Barremian–Aptian             | 27                     | Temperate              |
| 3A  | Great Britain               | Kingsclere Borehole, Berkshire | Pollen                                                               | Barremian–Aptian boundary    | 28, 29                 | Temperate              |
| 3A  | Great Britain               | “Wealden sediments”            | Macrofossils and mesofossils                                         | Barremian                    | 27, 30, 31             | Temperate              |
| 4A  | Virginia                    | Bank near Brooke               | Macrofossils (leafs)                                                 | Early to Middle Albian       | 32–34                  | Temperate              |
| 4A  | Virginia                    | Drewry’s Bluff                 | Macrofossils, mesofossil (fruits, seeds, and stamens of angiosperms) | Aptian                       | 23, 35–39              | Temperate              |
| 4A  | Virginia                    | Dutch Gap                      | Macrofossils (rare), mesofossils (diverse)                           | Early Aptian                 | 23, 32, 35, 36, 39, 40 | Temperate              |
| 5A  | Maryland and Washington, DC | Kenilworth                     | Pollen, mesofossils (fruits, seeds)                                  | Early Albian or Late Aptian  | 12, 41                 | Temperate              |
| 6A  | Texas                       | Glenrose                       | Pollen                                                               | Early Albian                 | 36                     | Arid                   |
| 7A  | Israel                      | Negev                          | Pollen                                                               | Late Barremian–Late Aptian   | 42, 43                 | Tropical               |
| 8A  | Jordan                      | Mahis                          | Mesofossils                                                          | Albian                       | 44                     | Tropical               |
| 9A  | Egypt                       | Dakhla basin                   | Pollen                                                               | Aptian or Early Albian       | 45                     | Tropical               |
| 10A | Tunisia                     | Bir el Karma and Fom el Hassan | Mesofossils                                                          | Late Aptian–Early Albian     | 46, 47                 | Tropical               |
| 11A | Gabon                       | North Gabon                    | Pollen                                                               | Late Barremian               | 48                     | Tropical               |
| 12A | Congo                       | Congo                          | Pollen                                                               | Barremian                    | 49                     | Tropical               |
| 13A | Brazil                      | Araripe basin                  | Macrofossils, pollens                                                | Late Aptian–Early Albian     | 50–58                  | Tropical               |
| 14A | Transbaikalia               | Semion Valley                  | Mesofossils, pollen                                                  | Aptian–Early Albian          | 59                     | Cold/temperate         |
| 15A | Mongolia                    |                                | Pollen                                                               | Aptian or Late Barremian     | 60, 61                 | Temperate              |
| 16A | China                       | Heilongjiang Province          | Angiosperm fossils                                                   | Aptian                       | 62                     | Temperate              |
| 16A | China                       | Jixi Basin                     | Angiosperm fossils                                                   | Mid-Barremian–Early Aptian   | 63                     | Temperate              |
| 16A | China                       | Liaoning                       | Angiosperm fossils (Archaeofructus)                                  | Early to Early–Late Aptian   | 64–67                  | Arid                   |
| 17A | Australia                   | Gippsland Basin                | Angiosperm                                                           | Aptian                       | 68                     | Cold/temperate         |
| 18A | South America               | Santa Cruz Province            | Angiosperms                                                          | Early–Late Aptian            | 69–75                  | Temperate              |
| 1C  | Czech Republic              | Bohemian Basin                 | Mesofossils (diverse)                                                | Cenomanian to Santonian      | 76–85                  | Temperate              |
| 2C  | Germany                     | Prangenhau and Rohdenhaus      | Mesofossils (diverse)                                                | Late Albian–Early Cenomanian | 86                     | Temperate              |
| 3C  | Virginia                    | Puddledock                     | Mesofossils (diverse)                                                | Middle Albian                | 12, 87–91              | Temperate              |

Table S3. Cont.

| No. | Country                     | Locality                                          | Type of fossils                                                                   | Dating                                      | Ref(s).           | LPJ biome (this study) |
|-----|-----------------------------|---------------------------------------------------|-----------------------------------------------------------------------------------|---------------------------------------------|-------------------|------------------------|
| 4C  | Maryland and Washington, DC | Kenilworth                                        | Mesofossils, pollen                                                               | Middle Albian                               | 12, 41            | Temperate              |
| 4C  | Maryland and Washington, DC | West Brothers                                     | Macrofossil floras (flowers, fruits and seeds, diverse)                           | Late Albian                                 | 92–94             | Temperate              |
| 4C  | Maryland and Washington, DC | Mauldin Mountain                                  | Mesofossilflora (diverse)                                                         | Earliest Cenomanian                         | 94–96             | Temperate              |
| 4C  | Maryland and Washington, DC | Bull Mountain                                     | Macrofossil floras (diverse)                                                      | Late Albian                                 | 96                | Temperate              |
| 5C  | New Jersey                  | Old Crossman Clay Pit                             | Angiosperm flowers, fruits and seeds, pollen                                      | Turonian age                                | 97–113            | Temperate              |
| 6C  | Massachusetts               | Gay Head                                          | Macrofossils (diverse), mesofossils                                               | Earliest Campanian                          | 114, 115          | Temperate              |
| 7C  | Alabama                     | Shirley's Mill                                    | Macrofossils                                                                      | Middle to Late Cenomanian                   | 116               | Temperate              |
| 8C  | Kansas                      | Linnenberger's Ranch                              | Mesofossils, pollen                                                               | Early Cenomanian                            | 117–124           | Temperate              |
| 8C  | Kansas                      | Hoisington locality                               | Angiosperm leaves                                                                 | Early Cenomanian                            | 122, 123          | Temperate              |
| 8C  | Kansas                      | Rose Creek locality                               | Macrofossils, angiosperm leaves                                                   | Early Cenomanian                            | 125, 126          | Temperate              |
| 9C  | Texas                       | Arthur's Bluff                                    | Macrofossil flora (leaves), pollen                                                | Cenomanian                                  | 119, 120, 127–131 | Tropical               |
| 10C | Alaska                      | Alaska                                            | Angiosperms                                                                       | Latest Albian–Cenomanian                    | 132               | Temperate              |
| 11C | Greenland                   | Nuussuaq and Vartenhuk                            | Angiosperms (rare)                                                                | Late Albian                                 | 133               | Temperate              |
| 11C | Greenland                   | Disko, Nuussuaq, and in the Umanak Fjord          | Angiosperms (diverse)                                                             | Latest Albian or earliest Campanian         | 133, 134          | Temperate              |
| 12C | Israel                      | Gerofit and Qetura                                | Angiosperms (diverse)                                                             | Early Turonian                              | 135–139           | Tropical               |
| 13C | Jordan                      | Jordan                                            | Angiosperm leaves (diverse)                                                       | Cenomanian                                  | 140               | Tropical               |
| 14C | Lebanon                     | Nammoura                                          | Angiosperms (leaves)                                                              | Cenomanian                                  | 141, 142          | Tropical               |
| 15C | Kazakhstan                  | Northwestern Kazakhstan                           | Macrofossils, mesofossils                                                         | From the latest Albian to the Maastrichtian | 143–147           | Temperate              |
| 15C | Kazakhstan                  | Western Kazakhstan (Karatsche-Tau and Kyzyl-Shen) | Angiosperms (diverse leaves)                                                      | Middle Albian                               | 144, 145          | Temperate              |
| 15C | Kazakhstan                  | Northwestern Kazakhstan (Sarbay Iron Quarry)      | Macrofossil (leaves), diverse mesofossil floras (flowers, fruits, seeds and twig) | Cenomanian–Early Turonian                   | 143, 146, 148–151 | Temperate              |
| 15C | Kazakhstan                  | Kachar                                            | Mesofossil floras (angiosperm fruits and seeds)                                   | Cenomanian–Turonian                         | 147, 152          | Temperate              |
| 15C | Kazakhstan                  | Southern Kazakhstan (Karatau range)               | Macrofossil floras                                                                | Turonian                                    | 153               | Temperate              |
| 16C | Siberia                     | West Siberia (Chulym–Yenisei)                     | Diverse macrofossil floras (leaves, reproductive structures)                      | Cenomanian                                  | 154, 155          | Cold                   |
| 16C | Siberia                     | Lena–Vilyuy River Basin                           | Macrofossil floras                                                                | Early Cenomanian                            | 156, 157          | Cold                   |
| 17C | Northeastern Russia         | Eliseevskoye                                      | Macrofossil floras (leaves and reproductive organs)                               | Latest Albian–Early Cenomanian              | 158               | Cold?                  |
| 18C | East of Russia              | Southern Primorye region                          | Angiosperm remains                                                                | Early to Middle Albian                      | 159               | Temperate              |
| 19C | Southern Africa             | Southern tip of South Africa                      | Pollen                                                                            | Cenomanian                                  | 160               | Temperate              |
| 19C | Southern Africa             | Central Botswana                                  | "Angiosperms mentioned"                                                           | Cenomanian–Coniacian                        | 161               | Temperate              |
| 20C | Madagascar                  | Morondova Basin                                   | Pollen                                                                            | Early Cenomanian                            | 162               | Temperate              |
| 21C | Australia                   | Eromanga Basin                                    | Macrofossils (diverse leaves)                                                     | Latest Albian–Early Cenomanian              | 163               | Temperate              |
| 22C | Antarctica                  | Alexander Island                                  | Angiosperms (diverse)                                                             | Late Albian                                 | 164–167           | Temperate              |
| 23C | New Zealand                 | Pitt Island                                       | Angiosperm leaves                                                                 | Turonian                                    | 168               | Temperate              |

Table S3. Cont.

| No. | Country        | Locality                                                      | Type of fossils                                                      | Dating                                         | Ref(s).               | LPJ biome (this study) |
|-----|----------------|---------------------------------------------------------------|----------------------------------------------------------------------|------------------------------------------------|-----------------------|------------------------|
| 24C | South America  | Santa Cruz Province, Bajo de los Corrales                     | Angiosperm leaves                                                    | Late Albian–Early Cenomanian                   | 169, 170              | Temperate              |
| 1M  | Portugal       | Mira                                                          | Mesoflora (diverse flowers, fruits, seeds, and stamens)              | Campanian–Maastrichtian age                    | 8, 171–175            | Tropical               |
| 1M  | Portugal       | Esgueira                                                      | Pollen, macrofossils (diverse), mesofossils                          | Campanian–Maastrichtian                        | 172, 173, 175, 176    | Tropical               |
| 2M  | Austria        | Grünbach                                                      | Macrofossils                                                         | EarlyCampanian                                 | 177                   | Temperate              |
| 2M  | Austria        | Gmünd                                                         | Pollen                                                               | Santonian                                      | 178                   | Temperate              |
| 3M  | Germany        | Aachen                                                        | Angiosperm remains                                                   | Santonian                                      | 78, 179–183           | Temperate              |
| 3M  | Germany        | Quedlinburg–Blankenberg area                                  | Macrofossil (leaf, reproductive organs), mesofossil floras (diverse) | Mid to Late Santonian                          | 78, 184, 185          | Temperate              |
| 3M  | Germany        | Eisleben                                                      | Macrofossils floras (diverse)                                        | Maastrichtian                                  | 78                    | Temperate              |
| 3M  | Germany        | Walbeck                                                       | Macrofossil and mesofossil floras (diverse)                          | Late Maastrichtian                             | 78                    | Temperate              |
| 4M  | Sweden         | Äsen                                                          | Angiosperm flowers, fruits, and seeds                                | Campanian                                      | 92, 174, 180, 186–194 | Temperate              |
| 5M  | Romania        | Budurone                                                      | Mesofossil floras                                                    | Maastrichtian                                  | 195                   | Temperate              |
| 6M  | North Carolina | Neuse River Cutoff                                            | Mesofossil floras (diverse)                                          | Early Campanian                                | 92, 146, 196–198      | Temperate              |
| 7M  | Georgia        | Upatoi Creek                                                  | Mesofossil floras                                                    | Coniacian                                      | 199                   | Temperate              |
| 7M  | Georgia        | Allon Quarry                                                  | Macrofossil and mesofossil floras                                    | Late Santonian                                 | 200–205               | Temperate              |
| 8M  | Colorado       | Denver Basin                                                  | Mesofossil floras                                                    | Maastrichtian                                  | 206                   | Temperate              |
| 9M  | Canada         | Vancouver Island, British Columbia; Brannan Lake              | Mesofossil floras                                                    | Early Campanian                                | 207–209               | Cold                   |
| 10M | Greenland      | Disko, Nuussuaq, and in the Umanak Fjord area                 | Angiosperm remains (diverse)                                         | Earliest Campanian                             | 133, 210–216          | Cold                   |
| 11M | Sudan          | JebelMudah                                                    | Pollen and mesofossils (angiosperm fruits and leaves)                | Turonian to Early Senonian                     | 217, 218              | Tropical               |
| 12M | Kazakhstan     | Northwestern Kazakhstan                                       | Macrofossil and mesofossil floras                                    | From the latest Albian to the Maastrichtian    | 143–147               | Temperate              |
| 12M | Kazakhstan     | Taldysay                                                      | Angiosperm reproductive organs (mesofossils)                         | Santonian–Early Campanian                      | 151                   | Temperate              |
| 13M | Japan          | Hokkaido; Sankebetsu River, Hidaka–Monbetsu River, Kumaoizawa | Mesofossils                                                          | Coniacian–Santonian                            | 219–222               | Tropical               |
| 13M | Japan          | Honshu                                                        | Angiosperms                                                          | EarlyConiacian                                 | 223–226               | Tropical               |
| 13M | Japan          | Gokurakuzawa                                                  | Mesofossils                                                          | EarlySantonian                                 | 227                   | Tropical               |
| 14M | India          | Chhindwara district of Madhya Pradesh                         | Reproductive structures, fruits, seeds                               | Maastrichtian                                  | 228–237               | Tropical               |
| 15M | Antarctica     | Antarctic Peninsula                                           | Mesofossil flora (diverse)                                           | Late Santonian                                 | 238, 239              | Temperate              |
| 15M | Antarctica     | James Ross Island                                             | Macrofossil floras (leaves)                                          | Coniacian                                      | 167                   | Temperate              |
| 15M | Antarctica     | South Shetland Islands                                        | Pollen, leaf assemblages                                             | Late Campanian to probably Early Maastrichtian | 240                   | Temperate              |
| 16M | Nigeria        |                                                               | Fruit and seed floras                                                | Maastrichtian                                  | 241–244               | Tropical               |
| 17M | New Zealand    | Pakawau Bush Road                                             | Flowers                                                              | Campanian or Maastrichtian                     | 245, 246              | Temperate              |

1. Friis EM, Crane PR, Pedersen KR (2011) *Early Flowers and Angiosperm Evolution* (Cambridge Univ Press, Cambridge, UK).

2. Rey J (1972) Recherches géologiques sur le Crétacé inférieur de l'Estremadura (Portugal). *Serv Geol Portugal Mem* 3(21):1–477.

3. Rey J (1993) Les unités lithostratigraphiques du groupe de Torres Vedras (Estremadura, Portugal). *Comun Inst Geol Mineiro* 79:75–85.

4. Rey J, Dinis JL, Callapez P, Cunha PP (2006) *Da Rotura Continental a Margem Passiva. Composicao e Evolucao do Cretacico de Portugal* (Cadernos de Geologia de Portugal, Lisbon).

5. Dinis JL, Rey J, Graciansky P-C (2002) Le bassin lusitanien (Portugal) à l'Aptien supérieur-Albien: Organisation séquentielle, proposition de corrélations, évolution. *C R Geosci* 334(10): 757–764.

6. de Saporta G (1894) *Flore Fossile du Portugal. Nouvelles Contributions à la Flore Mésozoïque. Accompagnées d'une Notice Stratigraphique par Paul Choffat* (Imprimerie de l'Acad R des Sci, Lisbon).
7. Teixeira C (1948) *Flora Mesozoica Portuguesa* (Direcção Geral de Minas e Serv Geol, Serv Geol de Portugal, Lisbon).
8. Friis EM, Pedersen KR, Crane PR (2006) Cretaceous angiosperm flowers: Innovation and evolution in plant reproduction. *Palaeogeogr Palaeoclimatol Palaeoecol* 232(2-4):251–293.
9. Friis EM, Pedersen KR, Crane PR (1994) Angiosperm floral structures from the Early Cretaceous of Portugal. *Plant Syst Evol* 8(Suppl):31–49.
10. Friis EM, Pedersen KR, Crane PR (1999) Early angiosperm diversification: The diversity of pollen associated with angiosperm reproductive structures in Early Cretaceous floras from Portugal. *Ann Mo Bot Gard* 86(2):259–296.
11. Teixeira C (1947) Nouvelles recherches et révision de la flore de Cercal. *Broteria Ser Trimest Cienc Nat* 16:5–15.
12. Friis EM, Crane PR, Pedersen KR (1997) Anacostia, a new basal angiosperm from the Early Cretaceous of North America and Portugal with monocolpate/trichotomocolpate pollen. *Grana* 36(4):225–244.
13. Friis EM, Pedersen KR (2011) Canrightia resinifera, a new Early Cretaceous fruit of magnoliacean affinity from Portugal. *Grana* 50:3–29.
14. Eriksson O, Friis EM, Löfgren P (2000) Seed size, fruit size and dispersal spectra in angiosperms from the Early Cretaceous to the Late Tertiary. *Am Nat* 156(1):47–58.
15. Eriksson O, Friis EM, Pedersen KR, Crane PR (2000) Seed size and dispersal systems of Early Cretaceous angiosperms from Famalicao, Portugal. *Int J Plant Sci* 161(2):319–329.
16. Friis EM, Pedersen KR, Crane PR (2000) Fossil floral structures of a basal angiosperm with monocolpate, reticulate-acolumellate pollen from the Early Cretaceous of Portugal. *Grana* 39(5):226–245.
17. Friis EM, Pedersen KR, Crane PR (2000) Reproductive structure and organization of basal angiosperms from the Early Cretaceous (Barremian or Aptian) of Western Portugal. *Int J Plant Sci* 161(6, Suppl):S169–S182.
18. Friis EM, Pedersen KR, Crane PR (2001) Fossil evidence of water lilies (Nymphaeales) in the Early Cretaceous. *Nature* 410(6826):357–360.
19. Friis EM, Pedersen KR, von Balthazar M, Grimm GW, Crane PR (2009) Monetianthus mirus gen. et sp. nov., a nymphaealean flower from the Early Cretaceous of Portugal. *Int J Plant Sci* 170(8):1086–1101.
20. von Balthazar M, Pedersen KR, Friis EM (2005) Teixeiraia lusitana gen. et sp. nov., a ranunculacean flower from the Early Cretaceous of Portugal. *Plant Syst Evol* 255:55–275.
21. Pedersen KR, von Balthazar M, Crane PR, Friis EM (2007) Early Cretaceous floral structures and in situ tricolpate-striate pollen: New early eudicots from Portugal. *Grana* 46(3):176–196.
22. Friis EM, Pedersen KR, Crane PR (2009) Early Cretaceous mesofossils from Portugal and eastern North America related to the Bennettitales-Erdtmanithecates-Gnetales group. *Am J Bot* 96(1):252–283.
23. Rydin C, Pedersen KR, Crane PR, Friis EM (2006) Former diversity of Ephedra (Gnetales): Evidence from Early Cretaceous seeds from Portugal and North America. *Ann Bot (Lond)* 98(1):123–140.
24. Friis EM, Pedersen KR, Crane PR (2010) Diversity in obscurity: Fossil flowers and the early history of angiosperms. *Philos Trans R Soc Lond B Biol Sci* 365(1539):369–382.
25. Friis EM, Pedersen KR (1996) Eucommiitheca, a new pollen organ with Eucommiidites pollen from the Early Cretaceous of Portugal. *Grana* 35(2):104–112.
26. Diéguez C, Martín-Closas C, Trinca P, Lopéz-Moroon N (1995) IV. Paleontology. 1 Flora. *Las Hoyas, a Lacustrine Konservat-Lagerstätte, Cuenca, Spain. II International Symposium on Lithographic Limestones, Field Trip Guide Book*, ed Meleéndez MN (Madrid, Univ Complutense de Madrid), pp 29–32.
27. Watson J, Sincock CA (1992) *Bennettitales of the English Wealden* (The Palaeontogr Soc, London).
28. Couper RA (1958) British Mesozoic microspores and pollen grains. A systematic and stratigraphic study. *Palaeontographica* 103:75–179.
29. Hughes NF, McDougall AB, Chapman JL (1991) Exceptional new record of Cretaceous Hapterid pollen from southern England. *J Micropalaeontol* 10(1):75–82.
30. Hughes NF (1994) *The Enigma of Angiosperm Origins* (Cambridge Univ Press, Cambridge, UK).
31. Batten DJ (1998) Palaeoenvironmental implication of plant, insect and other organic-walled microfossils in the Weald Clay Formation (Lower Cretaceous) of southeast England. *Cretac Res* 19(3-4):279–315.
32. Fontaine WM (1889) *The Potomac or Younger Mesozoic Flora*, US Geological Survey Monograph (US Gov Print Off, Washington, DC), Vol 15.
33. Hickey LJ, Doyle JA (1977) Early Cretaceous fossil evidence for angiosperm evolution. *Bot Rev* 43(1):2–104.
34. Crane PR, Pedersen KR, Friis EM, Drinnan AN (1993) Early Cretaceous (Early to Middle Albian) platanoid inflorescences associated with Sapindopsis leaves from the Potomac Group of Eastern North America. *Syst Bot* 18(2):328–344.
35. Doyle JA, Hickey LJ (1976) *Pollen and Leaves from the Mid-Cretaceous Potomac Group and Their Bearing on Early Angiosperm Evolution*, ed Beck CB (Columbia Univ Press, New York), pp 139–206.
36. Upchurch GR, Doyle JA (1981) *Paleoecology of the Conifers Frenelopsis and Pseudofrenelopsis (Cheirolepidiaceae) from the Cretaceous Potomac Group of Maryland and Virginia*, ed Romans RC (Plenum, New York), pp 167–202.
37. Crane PR, Upchurch GR (1987) Drewhria potomacensis gen. et sp. nov., an early Cretaceous member of Gnetales from the Potomac Group of Virginia. *Am J Bot* 74(11):1722–1736.
38. Brenner GJ (1967) The gymnospermous affinity of Eucommiidites Erdtman, 1948. *Rev Palaeobot Palynol* 5(1-4):123–127.
39. Pedersen KR, Friis EM, Crane PR (1993) Pollen organs and seeds with Decussosporites Brenner from Lower Cretaceous Potomac Group sediments of eastern USA. *Grana* 32(4-5):273–289.
40. Ward LF (1905) *Status of the Mesozoic Floras of the United States. Second Paper*, Monographs of the United States Geological Survey (US Gov Print Off, Washington, DC), Vol 48, pp 1–616.
41. Brenner GJ (1963) The spores and pollen of the Potomac Group of Maryland. *Md Dep Geol Mines Water Resour Bull* 27:1–215.
42. Brenner GJ, Bickoff IS (1992) Palynology and the age of the Lower Cretaceous basal Kurnub Group from the coastal plain to the northern Negev of Israel. *Palynology* 16(1):137–185.
43. Walker JW, Brenner GJ, Walker AG (1983) Winteraceous pollen in the lower cretaceous of Israel: Early evidence of a magnoliacean angiosperm family. *Science* 220(4603):1273–1275.
44. Taylor DW, Brenner GJ, Basha SH (2008) Scutifolium jordanicum gen. et sp. nov. (Cabombaceae), an aquatic fossil plant from the Lower Cretaceous of Jordan, and the relationships of related leaf fossils to living genera. *Am J Bot* 95(3):340–352.
45. Schrank E (1983) Scanning electron and light microscopic investigations of angiosperm pollen from the Lower Cretaceous of Egypt. *Pollen Spores* 25(2):213–242.
46. Mohr BAR, Bernardes-de-Oliveira MEC, Barale G, Ouaja M (2006) Palaeogeographic distribution and ecology of Klitzschophyllites, an early Cretaceous angiosperm in southern Laurasia and northern Gondwana. *Cretac Res* 27(3):464–472.
47. Barale G, Ouaja M (2001) Découverte de nouvelles flores avec des restes à affinités angiospermiennes dans le Crétacé inférieur du Sud Tunisien. *Cretac Res* 22(2):131–143.
48. Doyle JA, Jardiné S, Doerenkamp A (1982) Afropollis, a new genus of early angiosperm pollen, with notes on the Cretaceous palynostratigraphy and paleoenvironments of northern Gondwana. *Bull Cent Rech Explor Prod Elf-Aquitaine* 6:39–117.
49. Dejax J (1987) Sur la présence de grains de pollen à sculpture crotonoïde dans le Crétacé inférieur du Congo. *Mem Travaux Inst Montpellier* 17:253–271.
50. de Lima MR (1978) Palinologia da Formação Santana (Cretaceo do Nordeste do Brasil). Introdução geologica e descrição sistemática dos polens da subturma Azonotrilletes. *Ameghiniana Rev Asoc Paleontol Argentina* 15:333–365.
51. de Lima MR (1979) Palinologia da Formação Santana (Cretaceo do Nordeste do Brasil). II. Descrição sistemática dos esporos da subturma Zonotrilletes e turma Monoletes, e dos polens das turmas Saccites e Aletes. *Ameghiniana Rev Asoc Paleontol Argentina* 16:27–63.
52. de Lima MR (1980) Palinologia da Formação Santana (Cretaceo do Nordeste do Brasil). III. Descrição sistemática dos polens da turma Plicates (subturma Costates). *Ameghiniana Rev Asoc Paleontol Argentina* 17:15–47.
53. Osborn JM, Taylor TN, de Lima MR (1993) The ultrastructure of fossil ephedroid pollen with gnetalean affinities from the Lower Cretaceous of Brazil. *Rev Palaeobot Palynol* 77(3-4):171–184.
54. Mohr BAR, Friis EM (2000) Early angiosperms from the Aptian Crato Formation (Brazil), a preliminary report. *Int J Plant Sci* 161(6, Suppl):S155–S167.
55. Mohr BAR, Rydin C (2002) Trifurcatia flabellata n. gen. n. sp., a putative monocotyledon angiosperm from the Lower Cretaceous Crato Formation (Brazil). *Mitteilungen des Museums für Naturkunde Berlin. Geowissenschaftliche Reihe* 5:335–544.
56. Mohr BAR, Eklund H (2003) Araripia florifera, a magnoliid angiosperm from the Lower Cretaceous Crato Formation (Brazil). *Rev Palaeobot Palynol* 126(3-4):279–292.
57. Mohr BAR, Bernardes-de-Oliveira MEC (2004) Endressinia brasiliana, a magnoliacean angiosperm from the Lower Cretaceous Crato Formation (Brazil). *Int J Plant Sci* 165(6):1121–1133.
58. Mohr BAR, Bernardes-de-Oliveira MEC, Loveridge RF (2007) The macrophyte flora of the Crato Formation. *The Crato Fossil Beds of Brazil: Window into an Ancient World*, eds Martill DM, Bechly G, Loveridge RF (Cambridge Univ Press, Cambridge, UK), pp 537–565.
59. Vakhrameev VA, Kotova IZ (1977) Ancient angiosperms and accompanying plants from the Lower Cretaceous of Transbaikalia. *Paleontol J* 1977:487–495.
60. Nichols DJ, Watabe M, Ichinnorov N, Ariunchimeg Y (1997) Preliminary report on the palynology of the Cretaceous of the Gobi Desert, Mongolia. *Proceedings of the IX International Palynological Conference* (Am Assoc of Stratigr Palynol, Dallas, TX), pp 131–138.
61. Nichols DJ, Matsukawa M, Ito M (2006) Palynology and age of some Cretaceous nonmarine deposits in Mongolia and China. *Cretac Res* 27(2):241–251.
62. Sha J, et al. (2003) The Upper Jurassic-Lower Cretaceous of eastern Heilongjiang, Northeast China: Stratigraphy and regional basin history. *Cretac Res* 24(6):715–728.
63. Sun Z, Dilcher DL (1988) Fossil Smilax from Eocene sediments in western Tennessee. *Am J Bot* 75(Suppl 6):118.
64. Wu S-Q (1999) A preliminary study of the Jehol flora from western Liaoning. *Palaeoworld* 11:7–37.
65. Wu S-Q (2003) Land plants. *The Jehol Biota*, eds Chang M, Chen PJ (Shanghai Sci and Tech Publ, Shanghai, China), pp 167–177.



66. Sun G, Zheng S, Dilcher DL, Wang Y, Mei S (2001) *Early Angiosperms and Their Associated Plants from Western Liaoning, China* (Shanghai Sci and Tech Publ, Shanghai, China).
67. Rydin C, Wu SQ, Friis EM (2006) Liaoxia (Gnetales): Ephemeroïds from the Early Cretaceous Yixian Formation in China. *Plant Syst Evol* 262(3-4):239–265.
68. Taylor DW, Hickey LJ (1990) An aptian plant with attached leaves and flowers: Implications for angiosperm origin. *Science* 247(4943):702–704.
69. Archangelsky S (1963) A new Mesozoic flora from Tico, Santa Cruz Province, Argentina. *Bull Br Mus Geology* 8(2):45–92.
70. Archangelsky S (1967) Estudio de la Formación Baquero Cretácico Inferior de Santa Cruz, Argentina. *Rev Mus Plata Nueva Ser Paleontol* 5:63–171.
71. Archangelsky A (2001) The Tico Flora (Patagonia) and the Aptian Extinction Event. *Acta Palaeobot* 41(2):115–122.
72. Archangelsky A, Taylor TN, Kurrmann MH (1986) Ultrastructural studies of fossil plant cuticles: Tico harrisii from the early Cretaceous of Argentina. *Bot J Linn Soc* 92:101–116.
73. Archangelsky S, Taylor TN (1986) Ultrastructural studies of fossil plant cuticles. II. Tarphyderma gen. n., a Cretaceous conifer from Argentina. *Am J Bot* 73(11):1577–1587.
74. Archangelsky S, Taylor TN (1993) The ultrastructure of in situ Clavatipollenites pollen from the Early Cretaceous of Patagonia. *Am J Bot* 80(8):879–885.
75. Romero EJ, Archangelsky S (1986) Early cretaceous angiosperm leaves from southern South America. *Science* 234(4783):1580–1582.
76. Knobloch E (1964) Neue Pflanzenfunde aus dem südböhmischen Senon. *Jahrb Staatl Mus Mineral Geol Dresden* 133–201.
77. Knobloch E, Mai DH (1984) Neue Gattungen nach Früchten und Samen aus dem Cenoman bis Maastricht (Kreide) von Mitteleuropa. *Feddes Repert* 95:3–41.
78. Knobloch E, Mai DH (1986) Monographie der Früchte und Samen in der Kreide von Mitteleuropa. *Rozpr Ustred Ustavu Geol* 47:1–219.
79. Velenovsky J (1882) Die Flora der Böhmisches Kreideformation. *Beitr Paläontol Osterreich-Ungarns Orientes* 2:8–32.
80. Velenovsky J (1883) Die Flora der Böhmisches Kreideformation. *Beitr Paläontol Osterreich-Ungarns Orientes* 3:1–22.
81. Velenovsky J (1884) Die Flora der Böhmisches Kreideformation. *Beitr Paläontol Osterreich-Ungarns Orientes* 4:1–14.
82. Velenovsky J (1889) Kvetena Ceskeho Cenomanu. *Rozpr Kralovske Ceské Spolecnosti Nauk* 7:1–75.
83. Velenovsky J, Viniklar L (1926) Flora Cretacea Bohemiae. I. *Rozpr Statniho Geol Ustavu Cesk Repub* 1:1–57.
84. Velenovsky J, Viniklar L (1927) Flora Cretacea Bohemiae. II. *Rozpr Statniho Geol Ustavu Cesk Repub* 2:1–54.
85. Velenovsky J, Viniklar L (1929) Flora Cretacea Bohemiae. III. *Rozpr Statniho Geol Ustavu Cesk Repub* 3:1–33.
86. Viehofen A, Hartkopf-Froöder C, Friis EM (2008) Inflorescences and flowers of *Mauldinia angustiloba* sp. nov. Lauraceae from mid-Cretaceous karst infillings in the Rhenish Massif, Germany. *Int J Plant Sci* 169(7):871–889.
87. Crane PR, Friis EM, Pedersen KR (1994) Paleobotanical evidence on the early radiation of magnoliid angiosperms. *Plant Syst Evol* 8(Suppl):51–72.
88. Friis EM, Eklund H, Pedersen KR, Crane PR (1994) *Virginianthus calycanthoides* gen. et sp. nov. - a calycanthaceous flower from the Potomac Group (Early Cretaceous) of eastern North America. *Int J Plant Sci* 155(6):772–785.
89. Friis EM, Pedersen KR, Crane PR (1995) *Appomattoxia ancistrophora* gen. et sp. nov., a new Early Cretaceous plant with similarities to Circaeaster and extant Magnoliidae. *Am J Bot* 82(7):933–943.
90. von Balthazar M, Pedersen KR, Crane PR, Stampanoni M, Friis EM (2007) *Potomacanthus lobatus* gen. et sp. nov., a new flower of probable Lauraceae from the Early Cretaceous (Early to Middle Albian) of eastern North America. *Am J Bot* 94(12):2041–2053.
91. von Balthazar M, Pedersen KR, Crane PR, Friis EM (2008) *Carpstellia lacunata* gen. et sp. nov., a new basal angiosperm flower from the Early Cretaceous (Early to Middle Albian) of eastern North America. *Int J Plant Sci* 169(7):890–898.
92. Friis EM, Crane PR, Pedersen KR (1988) Reproductive structures of Cretaceous Platanaceae. *Biol Skr K Dan Vidensk Selsk* 31:1–55.
93. Crane PR, Friis EM, Pedersen KR (1989) Reproductive structure and function in Cretaceous Chloranthaceae. *Plant Syst Evol* 165:211–226.
94. Drinnan AN, Crane PR, Pedersen KR, Friis EM (1991) Angiosperm flowers and tricolpate pollen of buxaceous affinity from the Potomac Group (mid- Cretaceous) of eastern North America. *Am J Bot* 78(2):153–176.
95. Drinnan AN, Crane PR, Friis EM, Pedersen KR (1990) Lauraceous flowers from the Potomac Group (mid- Cretaceous) of eastern North America. *Bot Gaz* 151(3):370–384.
96. Pedersen KR, Friis EM, Crane PR, Drinnan AN (1994) Reproductive structures of an extinct platanoid from the Early Cretaceous (latest Albian) of eastern North America. *Rev Palaeobot Palynol* 80(3-4):291–303.
97. Newberry JS (1895) *The Flora of the Amboy Clays*, US Geological Survey Monograph, ed Hollick CA (US Gov Print Off, Washington, DC), Vol 26.
98. Berry EW (1909) Contribution to the Mesozoic flora of the Atlantic coastal plain III. *Bull Torrey Bot Soc* 36(5):245–264.
99. Christopher RA (1979) Normapolles and triporate pollen assemblages from the Raritan and Magothy Formations (Upper Cretaceous) of New Jersey. *Palynology* 3:73–121.
100. Crepet WL, Nixon KC, Friis EM, Freudenstein JV (1992) Oldest fossil flowers of hamamelidaceae affinity, from the Late Cretaceous of New Jersey. *Proc Natl Acad Sci USA* 89(19):8986–8989.
101. Crepet WL, Nixon KC, Gandolfo MA (2005) An extinct calycanthoid taxon, *Jerseyanthus calycanthoides*, from the Late Cretaceous of New Jersey. *Am J Bot* 92(9):1475–1485.
102. Nixon KC, Crepet WL (1993) Late Cretaceous fossil flowers of ericalean affinity. *Am J Bot* 80(22):616–623.
103. Crepet WL, Nixon KC (1994) Flowers of Turonian Magnoliidae and their implications. *Plant Syst Evol* 8(Suppl):73–91.
104. Crepet W, Nixon K (1998) Fossil Clusiaceae from the late Cretaceous (Turonian) of New Jersey and implications regarding the history of bee pollination. *Am J Bot* 85(8):1122–1133.
105. Crepet WL, Nixon KC (1998) Two new fossil flowers of magnoliid affinity from the Late Cretaceous of New Jersey. *Am J Bot* 85(9):1273–1288.
106. Crepet WL (1996) Timing in the evolution of derived floral characters: Upper Cretaceous (Turonian) taxa with tricolpate and tricolpate-derived pollen. *Rev Palaeobot Palynol* 90(3-4):339–359.
107. Gandolfo M, Nixon K, Crepet W (1998) *Tylerianthus crossmanensis* gen. et sp. nov. (aff. Hydrangeaceae) from the Upper Cretaceous of New Jersey. *Am J Bot* 85(3):376–386.
108. Gandolfo M, Nixon K, Crepet W (1998) A new fossil flower from the Turonian of New Jersey: *Dressiantha bicarpellata* gen. et sp. nov. (Capparales). *Am J Bot* 85(7):964–974.
109. Gandolfo MA, Nixon KC, Crepet WL, Friis EM (1998) Oldest known fossils of monocotyledons. *Nature* 394(6693):532–533.
110. Gandolfo MA, Nixon KC, Crepet WL (2002) *Triuridaceae* fossil flowers from the Upper Cretaceous of New Jersey. *Am J Bot* 89(12):1940–1957.
111. Gandolfo MA, Nixon KC, Crepet WL (2004) Cretaceous flowers of Nymphaeaceae and implications for complex insect entrapment pollination mechanisms in early angiosperms. *Proc Natl Acad Sci USA* 101(21):8056–8060.
112. Hermesen EJ, Gandolfo MA, Nixon KC, Crepet WL (2003) *Divisestylus* gen. nov. (aff. Itaceae), a fossil saxifrage from the Late Cretaceous of New Jersey, USA. *Am J Bot* 90(9):1373–1388.
113. Martínez-Millán M, Crepet WL, Nixon KC (2009) *Pentapetalum trifasciculandricus* gen. et sp. nov., a thealean fossil flower from the Raritan Formation, New Jersey, USA (Turonian, Late Cretaceous). *Am J Bot* 96(5):933–949.
114. Hollick A (1906) *The Cretaceous Flora of Southern New York and New England*, US Geological Survey Monographs (US Gov Print Off, Washington, DC).
115. Tiffney BH (1977) Dicotyledonous angiosperm flower from the Upper Cretaceous of Martha's Vineyard. *Massachusetts. Nature* 265(5590):136–137.
116. Berry EW (1919) Upper Cretaceous floras of the eastern Gulf Region in Tennessee, Mississippi, Alabama, and Georgia. *US Geol Surv Prof Pap* 112:1–177.
117. Lesquereux L (1892) *Flora of the Dakota Group*, US Geological Survey Monographs (US Gov Print Off, Washington, DC), Vol 17.
118. Dilcher DL (1979) Early angiosperm reproduction: An introductory report. *Rev Palaeobot Palynol* 27(3-4):291–328.
119. Crane PR, Dilcher DL (1984) *Lesqueria*: An early angiosperm fruiting axis from the mid-Cretaceous. *Ann Mo Bot Gard* 71(2):384–402.
120. Dilcher DL (1989) The occurrence of fruits with affinity to Ceratophyllaceae in Lower and mid-Cretaceous sediments. *Am J Bot* 76(Suppl 6):162.
121. Retallack G, Dilcher DL (1981) Early angiosperm reproduction: *Prisca reynoldsii* gen. et sp. nov. From mid-Cretaceous coastal deposits, Kansas, USA. *Palaeontographica B* 179(5-6):103–137.
122. Dilcher DL, Crane PR (1984) *Archaeanthus*: An early angiosperm from the Cenomanian of the Western Interior of North America. *Ann Mo Bot Gard* 71(2):351–383.
123. Dilcher DL, Kovach WL (1986) Early angiosperm reproduction: *Caloda delevoryana* gen. et sp. nov., a new fructification from the Dakota Formation (Cenomanian) of Kansas. *Am J Bot* 73(8):1230–1237.
124. Wang H, Dilcher DL (2006) Aquatic angiosperms from the Dakota Formation (Albian, Lower Cretaceous), Hoisington III locality, Kansas, USA. *Int J Plant Sci* 167(2):385–401.
125. Upchurch GR, Dilcher DL (1990) Cenomanian angiosperm leaf megafossils, Dakota Formation, Rose Creek Locality, Jefferson County, southeastern Nebraska. *US Geol Surv Bull* 1915:1–55.
126. Basinger JF, Dilcher DL (1984) Ancient bisexual flowers. *Science* 224(4648):511–513.
127. Berry EW (1912) Contributions to the Mesozoic flora of the Atlantic coastal plain VIII. Texas. *J Torrey Bot Soc* 39(8):387–406.
128. Berry EW (1922) The flora of the Woodbine Sand at Arthurs Bluff, Texas. *US Geol Surv Prof Pap* 129-G:153–181.
129. Pedersen KR, Crane PR, Friis EM (1989) Pollen organs and seeds with *Eucommiidites* pollen. *Grana* 28(4):279–294.
130. Knowlton FH (1901) Reports by Professor F. H. Knowlton on fossil plants collected by T. Wayland Vaughan in Lamar County; by G. H. Ragsdale in Cooke County. T.V. Munson in Denison, TX. *US Geological Survey 21st Annual Report 1899–1900*, ed Hill RT (Rhamey Hill, Denison, TX), pp 314–318.
131. MacNeal DL (1958) The flora of the Upper Cretaceous Woodbine Sand in Denton County, Texas. *Monogr Acad Nat Sci Philadelphia* 10:1–152.
132. Smiley CJ (1969) Cretaceous floras of Chandler-Coville region, Alaska. Stratigraphy and preliminary floristics. *Am Assoc Pet Geol Bull* 53(3):482–502.
133. Seward AC (1926) The Cretaceous plant-bearing rocks of western Greenland. *Philos Trans R Soc Lond B Biol Sci* 215:57–175.
134. Dam G, et al. (2009) Lithostratigraphy of the Cretaceous–Paleocene Nuussuaq Group, Nuussuaq Basin, West Greenland. *Geol Surv Den Greenl Bull* 19:1–171.
135. Dobruskina IA (1996) Connections of Israeli Upper Cretaceous flora with coeval floras of adjacent regions. *Rheedeia* 6(1):43–58.



136. Dobruskina IA (1997) Turonian plants from the southern Negev, Israel. *Cretac Res* 18(1):87–107.
137. Krassilov VA, Dobruskina IA (1998) A graminoid plant from the Cretaceous of the Middle East. *Paleontol J* 32:429–434.
138. Krassilov VA (2004) Cretaceous floral structures from Negev, Israel as evidence of angiosperm radiation in the Gondwana realm. *Acta Palaeobot* 44(1):37–53.
139. Krassilov VA, Lewy Z, Nevo E, Silantjeva N (2005) Late Cretaceous (Turonian) Flora of Southern Negev, Israel (Pensoft, Sofia, Bulgaria).
140. Bender F, Mädler K (1969) Die sandige Schichtenfolge der Kreide mit einer Angiospermen-Flora in SüdJordanien. *Geol Jahrb Beih* 81:35–92.
141. Dilcher DL, Basson PW (1990) Mid-Cretaceous angiosperm leaves from a new fossil locality in Lebanon. *Bot Gaz* 151(4):538–547.
142. Krassilov VA, Bacchia F (2000) Cenomanian florule of Nam-moura, Lebanon. *Cretac Res* 21(6):785–799.
143. Shilin PV (1986) *Pozdnelovoye flory Kazakhstana: systematicheskii sostav, istoriya razvitiya, stratigraficheskoe znachenie* (Nauka, Alma-Ata).
144. Vakhrameev VA, Krassilov VA (1979) Reproductive structures of angiosperms from the Albian of Kazakhstan. *Paleontol J* 1979:112–118.
145. Krassilov VA, Shilin PV, Vakhrameev VA (1983) Cretaceous flowers from Kazakhstan. *Rev Palaeobot Palynol* 40(1-2):91–113.
146. Frumin S, Friis EM (1996) Liriodendroid seeds from the Late Cretaceous of Kazakhstan and North Carolina, USA. *Rev Palaeobot Palynol* 94(1-2):39–55.
147. Hvalj AV (2001) Karpologija srednelovoykh khvoynykh i tsvetkovykh Kachara (Jugo-Vostochnoe Zaural'e). PhD Thesis (Komarov Bot Inst, Russ Acad of Sci, Saint Petersburg, Russia).
148. Frumina SI, Zhilin SG, Korchagina IA (1995) Alapaja (Taxodiaceae) seeds from the Cenomanian-Turonian of Northern Kazakhstan. *Paleontol J* 29(1A):194–202.
149. Frumin S, Friis EM (1999) Magnoliid reproductive organs from the Cenomanian-Turonian of north-western Kazakhstan: Magnoliaceae and Illiciaceae. *Plant Syst Evol* 216:265–288.
150. Frumin S, Eklund H, Friis EM (2004) *Mauldinia hirsuta* sp. nov., a new member of the extinct genus *Mauldinia* (Lauraceae) from the Late Cretaceous (Cenomanian-Turonian) of Kazakhstan. *Int J Plant Sci* 165(5):883–895.
151. Krassilov VA, Shilin PV (1995) New platanoid staminate heads from the mid-Cretaceous of Kazakhstan. *Rev Palaeobot Palynol* 85(3):207–211.
152. Golovneva LB, Oskolski AA (2007) Infertescences of Cathiaria gen. n. from the late Cretaceous of North Kazakhstan and Siberia (Russia). *Acta Palaeobot* 47(1):57–87.
153. Jarmolenko AV (1935) The Upper Cretaceous flora of the North-Western Kara-Tau. *Acta Univ Asiae Mediae Ser Viiib Botanica* 28:1–36.
154. Golovneva LB (2007) Occurrence of Sapindopsis (Platanaceae) in the Cretaceous of Eurasia. *Paleontol J* 41(11):1077–1090.
155. Golovneva LB (2008) A new platanaceous genus *Tasyimia* (angiosperms) from the Turonian of Siberia. *Paleontol J* 42(2):192–202.
156. Maslova NP, Golovneva LB (2000) A hamamelid inflorescence with in situ pollen grains from the Cenomanian of eastern Siberia. *Paleontol J* 34(Suppl 1):S40–S49.
157. Krassilov VA (1967) *Early Cretaceous Flora of South Primorye and its Stratigraphic Significance* (Nauka, Moscow).
158. Maslova NP, Herman A (2004) New finds of fossil hamamelids and data on the phylogenetic relationships between the Platanaceae and Hamamelidaceae. *Paleontol J* 38(5):563–575.
159. Krassilov VA, Volynets Y (2008) Weedy Albian angiosperms. *Acta Palaeobot* 48(2):151–169.
160. McLachlan IR, Pieterse A (1978) Preliminary palynological results: Site 361, Leg 40. *Initial Rep Deep Sea Drill Proj* 24:857–881.
161. Rayner RJ (1993) The fossils from the Orapa Diamond mine: A review. *Botswana Notes Rec* 25:1–17.
162. Zavada MS (2003) The ultrastructure of angiosperm pollen from the Lower Cenomanian of the Morondava Basin, Madagascar. *Grana* 42:20–32.
163. Dettmann ME, Clifford HT, Peters M (2009) *Lovelleya wintonensis* gen. et sp. nov.—Early Cretaceous (late Albian), anatomically preserved, angiosperm flowers and fruits from the Winton Formation, western Queensland. *Cretac Res* 30(2):339–355.
164. Cantrill DJ (1996) Fern thickets from the Cretaceous of Alexander Island, Antarctica containing *Alamatus bifurcatus* Douglas and *Aculea acicularis* sp. nov. *Cretac Res* 17:169–182.
165. Cantrill DJ, Nichols GJ (1996) Taxonomy and palaeoecology of Early Cretaceous (Late Albian) angiosperm leaves from Alexander Island, Antarctica. *Rev Palaeobot Palynol* 92(1):1–28.
166. Cantrill DJ (1995) The occurrence of the fern *Hausmannia* Dunker (Dipteridaceae) in the Cretaceous of Alexander Island, Antarctica. *Alcheringa* 19(3):243–254.
167. Hayes PA, Francis JE, Cantrill DJ, Crame JA (2006) Palaeoclimate analysis of Late Cretaceous angiosperm leaf floras, James Ross Island, Antarctica. *Cretaceous-Tertiary High-Latitude Palaeoenvironments, James Ross Basin, Antarctica*, Geological Society Special Publication, eds Francis JE, Pirrie D, Crame JA (Geol Soc, London), Vol 258, pp 49–62.
168. Pole M, Philippe M (2010) Cretaceous plant fossils of Pitt Island, the Chatham group, New Zealand. *Alcheringa* 34(3):231–263.
169. Archangelsky S, et al. (2009) Early angiosperm diversification: Evidence from southern South America. *Cretac Res* 30(5):1073–1082.
170. Passalia MG, Romero EJ, Panza JL (2001) Imprints foliars del Cretácico de la provincia de Santa Cruz, Argentina. *Ameghiniana* 38(1):73–84.
171. Schönenberger J, Pedersen KR, Friis EM (2001) Normapolles flowers of fagalean affinity from the Late Cretaceous of Portugal. *Plant Syst Evol* 226(3-4):205–230.
172. Friis EM, Pedersen KR, Crane PR (1992) *Esgueiria* gen. nov., fossil flowers with combretaceous features from the Late Cretaceous of Portugal. *Biologiske Skrifter. K Dan Vidensk Selsk* 41:1–45.
173. Friis EM, Pedersen KR, Schönenberger J (2003) *Endressianthus*, a new Normapolles producing plant genus of fagalean affinity from the Late Cretaceous of Portugal. *Int J Plant Sci* 164: S201–S223.
174. Friis EM, Pedersen KR, Schönenberger J (2006) Normapolles plants: A complex of extinct fagalean lineages. *Plant Syst Evol* 260:107–140.
175. Friis EM, Pedersen KR, Crane PR (2010) Cretaceous diversification of angiosperms in the western part of the Iberian Peninsula. *Rev Palaeobot Palynol* 162(3):341–361.
176. Pons D, Broutin J (1978) Les organes reproducteurs de *Frenelopsis oligostomata* (Crétacé, Portugal). *Comptes Rendus 103e Congrès National des Sociétés Savantes, Nancy*, pp 139–159.
177. Herman AB, Kvacek J (2002) Campanian Grünbach Flora of Lower Austria: Preliminary floristics and palaeoclimatology. *Ann Nat Hist Mus Wien Ser B Bot Zool* 103A:1–21.
178. Zetter R, Hesse M, Huber KH (2002) Combined LM, SEM and TEM studies of Late Cretaceous pollen and spores from Gmünd, Lower Austria. *Stapfia* 80:201–230.
179. Batten DJ, Dupagne-Kievits J, Lister JK (1988) *Palynology of the Upper Cretaceous Aachen Formation of Northeastern Belgium*, eds Streeel M, Bles MJM (Nat Mus Lab Paleontol Univ Liège, Liège, Belgium), pp 95–103.
180. Friis EM, Crane PR (1989) Reproductive structures of Cretaceous Hamamelidae. *Evolution, Systematics, and Fossil History of the Hamamelidae. Introduction and 'Lower' Hamamelidae*, eds Crane PR, Blackmore S (Clarendon, Oxford, UK), pp 155–174.
181. Debey MH (1848) Uebersicht der urweltlichen Pflanzen des Kreidegebirges überhaupt und der Aachener Kreideschichten insbesondere. *Verh Naturhistorischen Ver Preussischen Rheinlandes* 5:113–125.
182. Kräusel R (1922) Beiträge zur Kenntnis der Kreideflora. I. Über einige Kreidepflanzen von Swalmen (Niederlande). *Meded Rijks Geol Dienst, Ser A* 2:1–40.
183. Kräusel R (1923) Über pflanzenführende Kreideschichten aus der Umgebung von Heerlen (Holländ. Limburg) und die Verbreitung des Aachener Sandes in den südlichen Niederlanden. *Senckenbergiana* 5:145–154.
184. Pacltova B (1982) Some pollen of recent and fossil species of the genus *Platanus* L. *Acta Univ Carol* 4:367–391.
185. Tschan GF, Denk T, von Balthazar M (2008) *Credneria* and *Platanus* (Platanaceae) from the Late Cretaceous (Santonian) of Quedlinburg, Germany. *Rev Palaeobot Palynol* 152(3-4): 211–236.
186. Friis EM, Skarby A (1981) Structurally preserved angiosperm flowers from the Upper Cretaceous of southern Sweden. *Nature* 291(5815):485–486.
187. Friis EM, Skarby A (1982) *Scandianthus* gen. nov., angiosperm flowers of saxifragalean affinity from the Upper Cretaceous of southern Sweden. *Ann Bot* 50:569–583.
188. Friis EM (1983) Upper Cretaceous (Senonian) floral structures of juglandalean affinity containing Normapolles pollen. *Rev Palaeobot Palynol* 39(1-2):161–188.
189. Friis EM (1984) Preliminary report on Upper Cretaceous angiosperm reproductive organs from Sweden and their level of organization. *Ann Mo Bot Gard* 71(2):403–418.
190. Friis EM (1985) Structure and function in Late Cretaceous angiosperm flowers. *Biol Skr K Dan Vidensk Selsk* 25:1–37.
191. Friis EM (1985) *Actinocalyx* gen. nov., sympetalous angiosperm flowers from the Upper Cretaceous of southern Sweden. *Rev Palaeobot Palynol* 45(3-4):171–183.
192. Friis EM (1990) *Silvianthemum suecicum* gen. et sp. nov., a new saxifragalean flower from the Late Cretaceous of Sweden. *Biol Skr* 36:1–35.
193. Eklund H, Friis EM, Pedersen KR (1997) Chloranthaceous floral structures from the Late Cretaceous of Sweden. *Plant Syst Evol* 207:13–42.
194. Schönenberger J, Friis EM (2001) Fossil flowers of ericalean affinity from the Late Cretaceous of Southern Sweden. *Am J Bot* 88(3):467–480.
195. Lindfors SM, Csikic Z, Grigorescu D, Friis EM (2010) Preliminary account of plant mesofossils from the Maastrichtian Budurone microvertebrate site of the Hateg Basin, Romania. *Palaeogeogr Palaeoclimatol Palaeoecol* 293(3-5):353–359.
196. Friis EM (1988) *Spirematospermum chandlerae* sp. nov., an extinct species of Zingiberaceae from the North American Cretaceous. *Tertiary Res* 9:7–12.
197. Mickle JE (1996) *Grexlupus carolinensis*, a new probable lauraceous fruit from the Late Cretaceous of North Carolina. *J Elisha Mitchell Sci Soc* 112(1):1–6.
198. Eklund H (2000) Lauraceous flowers from the Late Cretaceous of North Carolina, USA. *Bot J Linn Soc* 132(4):397–428.
199. Magallon-Puebla S, Herendeen PS, Crane PR (1997) *Quadriplatanus georgianus* gen. et sp. nov.: Staminate and pistillate platanaceous flowers from the Late Cretaceous (Coniacian-Santonian) of Georgia, USA. *Int J Plant Sci* 158(3):373–394.
200. Herendeen PS, Crane PR, Drinnan AN (1995) Fagaceous flowers, fruits, and cupules from the Campanian (Late Cretaceous) of Central Georgia, USA. *Int J Plant Sci* 156(1):93–116.
201. Herendeen PS, Magallon-Puebla S, Lupia R, Crane PR, Kobylinska J (1999) A preliminary conspectus of the Allon flora from the Late Cretaceous (Late Santonian) of central Georgia, USA. *Ann Mo Bot Gard* 86:407–471.
202. Keller JA, Herendeen PS, Crane PR (1996) Fossil flowers and fruits of the Actinidiaceae from the Campanian (Late Cretaceous) of Georgia. *Am J Bot* 83(4):528–541.
203. Magallon-Puebla S, Herendeen PS, Endress PK (1996) *Allonia decandra*: Floral remains of the tribe Hamamelideae (Hamamelidaceae) from Campanian strata of southeastern USA. *Plant Syst Evol* 202(3-4):177–198.
204. Crane PR, Herendeen PS (1996) Cretaceous floras containing angiosperm flowers and fruits from eastern North America. *Rev Palaeobot Palynol* 90(3-4):319–337.
205. Sims HJ, Herendeen PS, Crane PR (1998) A new genus of fossil Fagaceae from the Santonian (Late Cretaceous) of central Georgia, USA. *Int J Plant Sci* 159(2):391–404.

206. Johnson KR, Reynolds ML, Werth KW, Thomasson JR (2003) Overview of the Late Cretaceous, early Paleocene, and early Eocene megaflores of the Denver Basin, Colorado. *Rocky Mt Geol* 38(1):101–120.
207. Delevoyras T, Mickle JE (1995) Upper Cretaceous magnoliaceous fruit from British Columbia. *Am J Bot* 82(6):763–768.
208. Rothwell GW, Stockey RA (2002) Anatomically preserved Cycadeoidea (Cycadeoideaceae), with a reevaluation of systematic characters for the seed cones of Bennettitales. *Am J Bot* 89(9):1447–1458.
209. Stockey RA, Rothwell GW (2003) Anatomically preserved Williamsonia (Williamsoniaceae): Evidence for bennettitalean reproduction in the Late Cretaceous of Western North America. *Int J Plant Sci* 164(2):251–262.
210. Heer O (1882) *Flora Fossilis Grönlandica. Die Fossile Flora Grönlands. Part I. Flora Fossilis Arctica. Die Fossile Flora der Polarländer* (Wurster J and Comp, Zurich), pp 1809–1883.
211. Heer O (1883) *Flora Fossilis Grönlandica. Die Fossile Flora Grönlands. Part II. Flora Fossilis Arctica. Die Fossile Flora der Polarländer* (Wurster J and Comp, Zurich).
212. Heer O (1883) Oversigt over Grönlands fossile flora. *Medd Gronl* 5:81–202.
213. Heer O (1883) Flora fossilis Grönlandica. Afbildninger af Grönlands fossile flora. *Medd Gronl* 5(Suppl):1–27.
214. Nathorst AG (1890) Ueber die Reste eines Brotfruchtbaums, *Artocarpus dicksoni* n.sp., aus den cenomanen Kreideablagerungen Grönlands. *K Sven Vetenskapsakad Handl* 24:1–10.
215. Seward AC, Conway VM (1935) Additional Cretaceous plants from western Greenland. *K Sven Vetenskapsakad Handl* 15:1–51.
216. Seward AC, Conway VM (1939) Fossil plants from Kingigtoq and Kangdlunguaq, West Greenland. *Medd Gronl* 93:1–41.
217. Schrank E (1992) Nonmarine Cretaceous correlations in Egypt and northern Sudan: Palynological and palaeobotanical evidence. *Cretac Res* 13(4):351–368.
218. Schrank E, Rufflé L (2003) The Late Cretaceous leaf flora from Jebel Mudaha, Sudan. *Cour Forschungsinst Senckenberg* 241:119–129.
219. Nishida H (1994) Elsemaria, a Late Cretaceous angiosperm fructification from Hokkaido, Japan. *Plant Syst Evol* 8(Suppl):123–135.
220. Nishida H, Nishida M (1988) Protomonimia kasainakajhongii gen. et sp. nov.: A permineralized magnoliacean fructification from the mid-Cretaceous of Japan. *Bot Mag* 101:397–437.
221. Nishida M, Ohsawa T, Nishida H, Yoshida A, Kanie Y (1996) A permineralized magnoliacean fructification from the Upper Cretaceous of Hokkaido, Japan. *Res Inst of Evol Biol* 7:19–30.
222. Ohana T, Kimura T, Chitaley S (1999) Keraocarpon gen. nov., magnoliacean fruits from the Upper Cretaceous of Hokkaido, Japan. *Paleontol Res* 3(4):294–302.
223. Takahashi M, Crane PR, Ando H (1999) Esgueiria futabensis sp. nov.; a new angiosperm flower from the Upper Cretaceous (lower Coniacian) of northeastern Honshu, Japan. *Paleontol Res* 3(2):81–87.
224. Takahashi M, Crane PR, Ando H (1999) Fossil flowers and associated plant fossils from the Kamikitaba locality (Ashizawa Formation, Futaba Group, lower Coniacian, Upper Cretaceous) of Northeast Japan. *J Plant Res* 112:187–206.
225. Takahashi M, Herendeen PS, Crane PR (2001) Lauraceous flowers from the Kamikitaba locality (Lower Coniacian; Upper Cretaceous) of Northeast Japan. *J Plant Res* 114:429–434.
226. Takahashi M, Friis EM, Herendeen PS, Crane PR (2008) Fossil flowers of Fagales from the Kamikitaba Locality (Early Coniacian; Late Cretaceous) of Northeastern Japan. *Int J Plant Sci* 169(7):899–907.
227. Takahashi M, Crane PR, Friis EM (2007) Fossil seeds of Nymphaeales from the Tamayama Formation (Futaba Group), Upper Cretaceous (Early Santonian) of northeastern Honshu, Japan. *Int J Plant Sci* 168(3):341–350.
228. Sahni B (1934) The silicified flora of the Deccan Intertrappean Series, Part II. Gymnospermous and angiospermous fruits. 21st Indian Science Congress, Bombay, pp 317–318.
229. Sahni B, Rode KP (1937) Fossil plants from the Intertrappean beds of the Mohgaon Kalan, in the Deccan, with a sketch of the geology of Chhindwara district. *Proc Natl Acad Sci India, Sect B Biol Sci* 7:165–174.
230. Chitaley SD (1956) On the fructification of *Tricocites trigonum* Rode from the Deccan Intertrappean Series of India. *Palaeobotanist* 5:56–63.
231. Prakash U (1960) A survey of the Deccan Intertrappean flora of India. *J Paleontol* 34(5):1027–1040.
232. Chitaley SD, Sheikh MT (1973) *Harrisostrobos intertrappea* gen. et sp. nov., a petrified gymnospermous cone from the Deccan Intertrappean beds of India. *Palaeontographica B* 144(1–2):25–30.
233. Chitaley SD, Patel MZ (1975) *Raoanthus intertrappea*, a new petrified flower from India. *Palaeontographica B* 153(4–6):141–149.
234. Nambudiri EMV, Tidwell WD (1978) On probable affinities of *Viracarpon Sahni* from the Deccan Intertrappean flora of India. *Palaeontographica B* 166(1–3):30–43.
235. Patil GV, Singh RB (1978) Fossil *Eichhornia* from the Eocene Deccan Intertrappean beds, India. *Palaeontographica B* 167(1–3):1–7.
236. Patil GV, Upadhye EV (1984) *Cocos-Like Fruit from Mohgaonkalan and Its Significance Towards the Stratigraphy of Mohgaonkalan Intertrappean Beds*, eds Sharma AK, Mitra GC, Banerjee M (Today and Tomorrow's Printers and Publisher, New Delhi), pp 541–554.
237. Bonde SD (2005) *Eriospermocormus indicus* gen. et sp. nov. (Liliales: Eriospermaceae): First record of a monocotyledonous corm from the Deccan Intertrappean beds of India. *Cretac Res* 26(2):197–205.
238. Eklund H (2003) First Cretaceous flowers from Antarctica. *Rev Palaeobot Palynol* 127(3–4):187–217.
239. Eklund H, Cantrill DJ, Francis JE (2004) Late Cretaceous mesofossil assemblage from Table Nunatak, Antarctica. *Cretac Res* 26(2):211–228.
240. Dutra TL, Batten DJ (2000) Upper Cretaceous floras of King George Island, West Antarctica, and their palaeoenvironmental and phytogeographic implications. *Cretac Res* 21(2–3):181–209.
241. Chesters KIM (1955) Some plant remains from the Upper Cretaceous and Tertiary of West Africa. *Ann Mag Nat Hist* 8(91):498–503.
242. van Hoeken-Klinkenberg PMJ (1964) A palynological investigation of some Upper Cretaceous sediments in Nigeria. *Pollen Spores* 6:209–231.
243. Jan du Chêne RE, Adegoke OS, Adediran SA, Petters SW (1978) Palynology and foraminifera of the Lokoja Sandstone (Maastrichtian), Bida Basin, Nigeria. *Rev Espanol Micropaleontol* 10(3):379–393.
244. Jan du Chêne R E, Klasz I, Archibong EE (1978) Biostratigraphic study of the borehole OJO-1, SW Nigeria, with special emphasis on the Cretaceous microflora. *Rev Micropaleontol* 21:123–139.
245. Kennedy EM, Spicer RA, Rees PM (2002) Quantitative palaeoclimate estimates from Late Cretaceous and Paleocene leaf floras in the northwest of the South Island, New Zealand. *Palaeogeogr Palaeoclimatol Palaeoecol* 184(3–4):321–345.
246. Kennedy EM, Lovis JD, Daniel JL (2003) Discovery of a Cretaceous angiosperm reproductive structure from New Zealand. *N Z J Geol Geophys Abstr* 46(4):519–522.
